# Supplementary material for: Perceived usefulness of a blended learning approach for skills training among medical interns: a pilot study
Source: PubMed Central journal article supplement — BMC Med Educ. 2024 Nov 25;24:1357. doi: 10.1186/s12909-024-06379-x (PMC11590293; doi:10.1186/s12909-024-06379-x), 2024-11-25
Supplement: 12909_2024_6379_MOESM1_ESM.pdf [file 12909_2024_6379_MOESM1_ESM.pdf]

# ISCIP -1

ISCIP-1  
IV Cannulation

\* Indicates required question

Email address \*

Your answer \_\_\_\_\_

How important do you think this skill is for your clinical practice \*  
Mark only one oval

Not impotant at all      1      2      3      4      5      Extremely important

                      

IV Cannulation - Grade the SOPs \*  
Mark only one oval

Very poor      1      2      3      4      5      Excellent

                      

IV Cannulation - Grade the video \*  
Mark only one oval

Very poor      1      2      3      4      5      Excellent

                      

IV Cannulation - Usefulness of the online content \*  
Mark only one oval

Not useful in learning the skill      1      2      3      4      5      Extremely useful in learning the skill

                      

IV Cannulation - Hands on skill station \*  
Mark only one oval

Not useful in learning the skill      1      2      3      4      5      Extremely useful in learning the skill

                      

Do you feel you will be able to do this procedure more confidently in real clinical scenario? \*

Mark only one oval

- Yes
- No
- Maybe

Suggestions for IV cannulation skill module \*

Your answer \_\_\_\_\_

# ISCIP -2

ISCIP-2  
Urethral catheterization

\* Indicates required question

Email address \*

Your answer \_\_\_\_\_

How important do you think this skill is for your clinical practice \*  
Mark only one oval

Not impotant at all      1      2      3      4      5      Extremely important

                      

Urethral catheterization - Grade the SOPs \*  
Mark only one oval

Very poor      1      2      3      4      5      Excellent

                      

Urethral catheterization- Grade the video \*  
Mark only one oval

Very poor      1      2      3      4      5      Excellent

                      

Urethral Catheterization - Usefulness of the online content \*  
Mark only one oval

Not useful in learning the skill      1      2      3      4      5      Extremely useful in learning the skill

                      

Urethral Catheterization- Hands on skill station \*  
Mark only one oval

Not useful in learning the skill      1      2      3      4      5      Extremely useful in learning the skill

                      

Do you feel you will be able to do this procedure more confidently in real clinical scenario? \*  
Mark only one oval

- Yes
- No
- Maybe

Suggestions for Urethral Catheterization skill module \*

Your answer \_\_\_\_\_

# ISCIP -3

ISCIP-3  
Gowning and Gloving

\* Indicates required question

Email address \*

Your answer \_\_\_\_\_

How important do you think this skill is for your clinical practice \*  
Mark only one oval

Not impotant at all      1      2      3      4      5      Extremely important

                      

Gowning and Gloving - Grade the SOPs \*  
Mark only one oval

Very poor      1      2      3      4      5      Excellent

                      

Gowning and Gloving - Grade the video \*  
Mark only one oval

Very poor      1      2      3      4      5      Excellent

                      

Gowning and Gloving - Usefulness of the online content \*  
Mark only one oval

Not useful in learning the skill      1      2      3      4      5      Extremely useful in learning the skill

                      

Gowning and Gloving - Hands on skill station \*  
Mark only one oval

Not useful in learning the skill      1      2      3      4      5      Extremely useful in learning the skill

                      

Do you feel you will be able to do this procedure more confidently in real clinical scenario? \*  
Mark only one oval

- Yes
- No
- Maybe

Suggestions for Gowning and Gloving skill module \*

Your answer \_\_\_\_\_

# ISCIP -4

ISCIP-4  
Basic suturing

\* Indicates required question

Email address \*

Your answer

How important do you think this skill is for your clinical practice \*  
Mark only one oval

Not impotant at all      1      2      3      4      5      Extremely important

                      

Basic suturing - Grade the SOPs \*  
Mark only one oval

Very poor      1      2      3      4      5      Excellent

                      

Basic suturing- Grade the video \*  
Mark only one oval

Very poor      1      2      3      4      5      Excellent

                      

Basic suturing - Usefulness of the online content \*  
Mark only one oval

Not useful in learning the skill      1      2      3      4      5      Extremely useful in learning the skill

                      

Basic suturing - Hands on skill station \*  
Mark only one oval

Not useful in learning the skill      1      2      3      4      5      Extremely useful in learning the skill

                      

Do you feel you will be able to do this procedure more confidently in real clinical scenario? \*  
Mark only one oval

- Yes
- No
- Maybe

Suggestions for Basic suturing skill module \*

Your answer

# ISCIP -5

ISCIP - 5  
Episiotomy repair

\* Indicates required question

Email address \*

Your answer \_\_\_\_\_

How important do you think this skill is for your clinical practice \*  
Mark only one oval

1 2 3 4 5  
Not important at all      Extremely important

Episiotomy repair - Grade the SOPs \*  
Mark only one oval

1 2 3 4 5  
Very poor      Excellent

Episiotomy repair - Grade the video \*  
Mark only one oval

1 2 3 4 5  
Very poor      Excellent

Episiotomy repair- Usefulness of the online content \*  
Mark only one oval

1 2 3 4 5  
Not useful in learning the skill      Extremely useful in learning the skill

Episiotomy repair - Hands on skill station \*  
Mark only one oval

1 2 3 4 5  
Not useful in learning the skill      Extremely useful in learning the skill

Do you feel you will be able to do this procedure more confidently in real clinical scenario? \*  
Mark only one oval

- Yes  
 No  
 Maybe

Suggestions for Episiotomy repair skill module \*

Your answer \_\_\_\_\_
